# Supplementary material
Source: Research Square preprint supplement (doi:10.21203/rs.3.rs-9637034/v1)
Supplement: Supplementary file 1 [file e6f8b0bd8018653972ef7f37.pdf]

# 1 Probabilistic Tsunami Risk Assessment based on submarine active 2 faults in the Sea of Japan for a thermal power plant

3  
4 Honoka Kikuta, Yushi Miki, An-Chi Cheng, Anawat Suppasri, Fumihiko Imamura  
5

## 6 Supplementary material

7 This supplementary material consists of supplementary notes, figures and tables.  
8

### 9 Supplementary note:

10 The fault area was for submarine active faults published by MLIT was obtained from  
11 the published fault length and fault width. The magnitude was calculated following the scaling  
12 law using the fault area [1].

$$13 \quad M_o = \left( \frac{S}{4.24} \times 10^5 \right)^2 \times 10^{-7} \quad (6.5 \leq M_w < 7.7) \quad (1)$$

$$14 \quad M_o = 1.575 \times S \times 10^{11} \quad (7.7 \leq M_w) \quad (2)$$

$$15 \quad \log M_o = 1.5M_w + 9.1 \quad (3)$$

16 where,  $M_o$  is the seismic moment,  $S$  is the fault area,  $M_w$  is the moment magnitude. The  
17 average slip amount was calculated using the following equation.

$$18 \quad M_o = \mu DS \quad (4)$$

19 where,  $M_o$  is the seismic moment,  $\mu$  is the modulus of rigidity,  $D$  is the average slip amount,  
20  $S$  is the fault area. The modulus of rigidity was set to a uniform value of  $3.5 \times 10^{10} \text{ Nm}^{-2}$  [2].

21 The slip amount of the submarine active fault models published by HERP is expressed  
22 as follows [3].

$$23 \quad D = 10^{-1}L \quad (5)$$

24 where,  $D$  is the average slip amount, and  $L$  is the fault length. The magnitude was calculated  
25 using Eqs. (3) and (4) using fault slip amount.

26 It should be noted that the slip amount was limited to 10 m when the length of the fault  
27 exceeded 100 km [4].  
28

29 **Supplementary figures**

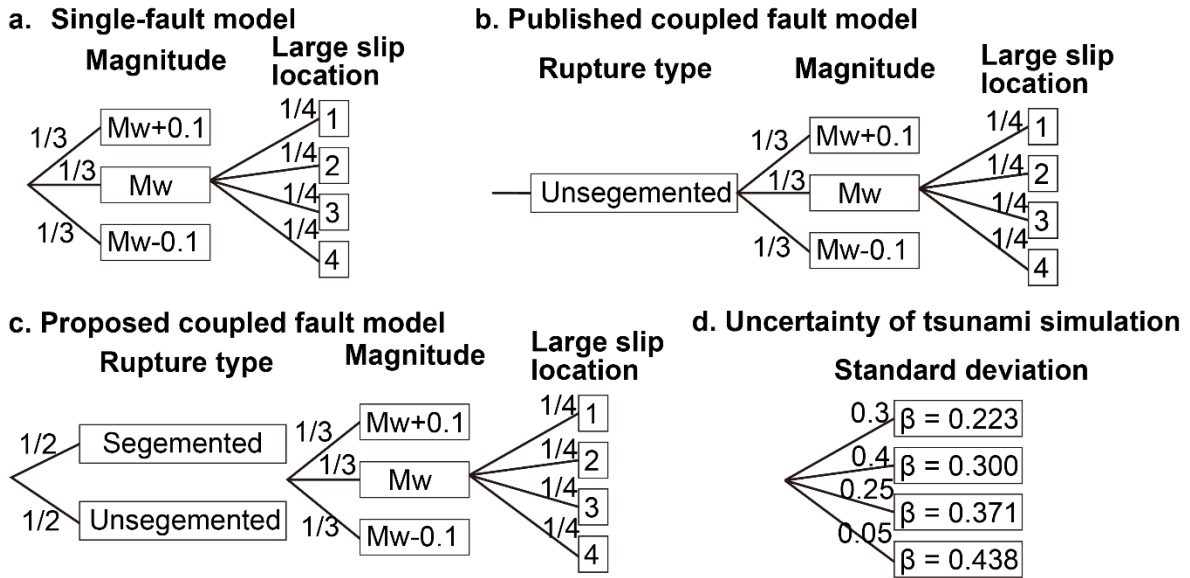

30  
31  
32  
33  
34  
35

**Supplementary Fig. 1** Logic tree considered in the probabilistic tsunami hazard assessment. (a-c) Source model logic tree for (a) single-fault model, (b) published coupled fault model, and (c) proposed coupled fault model. (d) Logic tree for considering the uncertainty of tsunami simulation. The numbers next to the branches indicate their weight.

36 **Supplementary tables**

37 Supplementary Table 1. Earthquake recurrence periods for the Northern Japan Sea [2]

| Sea Area                        | Recurrence Periods (year) |
|---------------------------------|---------------------------|
| Off the western coast of Aomori | 500-1400                  |
| Off the coast of Akita          | 1000-1500                 |
| Off the coast of Yamagata       | 1000-1500                 |
| Off the coast of Niigata        | 1000-1500                 |

38

39

40 **References**

- 41 1. Irikura, K. & Miyake, H. Prediction of Strong Ground Motions Scenario Earthquakes.  
42 *Journal of Geography* **110**, (2001).
- 43 2. Japan Society of Civil Engineering. *Tsunami Assessment Method for Nuclear Power*  
44 *Plants in Japan 2016*. (2016).
- 45 3. Matsuda, T., Yamazaki, H., Nakata, T. & Imaizumi, T. The surface fault associated with  
46 the Rikuu Earthquake of 1896. *Bull. Earthq. Res. Inst* **55**, 795–855 (1980).
- 47 4. Murotani, S., Matsushima, S., Azuma, T., Irikura, K. & Kitagawa, S. Scaling Relations  
48 of Source Parameters of Earthquakes Occurring on Inland Crustal Mega-Fault Systems.  
49 *Pure Appl. Geophys.* **172**, 1371–1381 (2015).
- 50
